# Supplementary material for: Fibroblast growth factor 21 reflects liver fat accumulation and dysregulation of signalling pathways in the liver of C57BL/6J mice
Source: PubMed Central journal article supplement (PMC4965761; doi:10.1038/srep30484), 2016-07-29
Supplement: srep30484-s1.pdf [file srep30484-s1.pdf]

## **SUPPLEMENTARY INFORMATION**

### **Fibroblast growth factor 21 reflects liver fat accumulation and dysregulation of signalling pathways in the liver of C57BL/6J mice**

Fenni Rusli<sup>1</sup>, Joris Deelen<sup>2</sup>, Evi Andriyani<sup>1</sup>, Mark V Boekschoten<sup>1</sup>, Carolien Lute<sup>1</sup>, Erik B. van den Akker<sup>2,3</sup>, Michael Müller<sup>4</sup>, Marian Beekman<sup>2</sup>, Wilma T Steegenga<sup>1\*</sup>

<sup>1</sup> Nutrition, Metabolism & Genomics Group, Division of Human Nutrition, Wageningen University, 6700 EV Wageningen, The Netherlands

<sup>2</sup> Department of Molecular Epidemiology, Leiden University Medical Center, Leiden, The Netherlands

<sup>3</sup> The Delft Bioinformatics Lab, Delft University of Technology, Mekelweg 4, 2628 CD, Delft, The Netherlands

<sup>4</sup> Norwich Medical School, University of East Anglia, Norwich, UK

\* Corresponding author. Address: Nutrition, Metabolism & Genomics Group, Division of Human Nutrition, Wageningen University, P.O. Box 8129, NL-6700 EV Wageningen, The Netherlands. Tel.: +31 317 482590, fax: +31 317 485789.

E-mail address: wilma.steegenga@wur.nl (W.T. Steegenga).

## **SUPPLEMENTARY TABLES**

**Supplementary Table S1. Composition of the experimental diet.** The CR diet was adjusted for the vitamins and minerals amount to ensure a homologous intake between both groups.

|                               | <b>AIN-93W</b> | <b>AIN-93W-CR</b> | <b>AIN-93W-MF</b> |
|-------------------------------|----------------|-------------------|-------------------|
| Energy (kcal/g)               | 3.85           | 3.77              | 4.25              |
| Energy from fat (%)           | 9              | 10                | 25                |
| Energy from protein (%)       | 15             | 15                | 13                |
| Energy from carbohydrates (%) | 76             | 75                | 61                |
| Mineral mix AIN-93M (g%)      | 35             | 50                | 35                |
| Vitamin mix AIN-93M (g%)      | 10             | 14                | 10                |
| Choline bitartrate (g%)       | 2.5            | 3.5               | 2.5               |

**Supplementary Table S2.** List of primer sequence used in Q-PCR analysis

| Gene name     | Forward primer (5' → 3')       | Reverse primer (5' → 3')       |
|---------------|--------------------------------|--------------------------------|
| <i>Fgf21</i>  | GTG-TCA-AAG-CCT-CTA-GGT-TTC-TT | GGT-ACA-CAT-TGT-AAC-CGT-CCT- C |
| <i>Mogat1</i> | TCC-CGT-TGT-TCC-GAG-AAT-ATC-T  | TGC-TCA-GCA-CAT-GAG-ACA-AAC    |
| <i>G0s2</i>   | AGT-GCT-GCC-TCT-CTT-CCC-AC     | TTT-CCA-TCT-GAG-CTC-TGG-GC     |
| <i>Acot3</i>  | TCC-AAC-ATC-GGC-GGA-AAC-TTA    | ACG-GGA-ATC-AAG-CTC-TTC-TGG    |
| <i>Hmgcr</i>  | AGC-TTG-CCC-GAA-TTG-TAT-GTG    | TCT-GTT-GTG-AAC-CAT-GTG-ACT-TC |
| <i>Ppara</i>  | TAT-TCG-GCT-GAA-GCT-GGT-GTA-C  | CTG-GCA-TTT-GTT-CCG-GTT-CT     |
| <i>Rplp0</i>  | ATG-GGT-ACA-AGC-GCG-TCC-TG     | GCC-TTG-ACC-TTT-TCA-GTA-AG     |

**Supplementary Table S3.** Characteristics of animals with/without NAFLD

|                                    | Without NAFLD (n = 53) | NAFLD (n = 36) | p-value |
|------------------------------------|------------------------|----------------|---------|
| Body weight (g)                    | 28.9 ± 0.9             | 44.5 ± 1.2     | <0.0001 |
| eWAT weight (g)                    | 0.46 ± 0.05            | 1.44 ± 0.59    | <0.0001 |
| Relative eWAT weight (%)           | 1.43 ± 0.11            | 3.19 ± 0.17    | <0.0001 |
| Liver weight (g)                   | 1.02 ± 0.04            | 1.71 ± 0.07    | <0.0001 |
| Relative liver weight (%)          | 3.50 ± 0.09            | 3.86 ± 0.15    | 0.0341  |
| Fasting plasma insulin (ng/ml)     | 0.627 ± 0.093          | 1.767 ± 0.283  | <0.0001 |
| Plasma ALT (U/l)                   | 6.82 ± 0.72            | 11.17 ± 1.03   | 0.0006  |
| IHTG (mg/g liver)                  | 22.2 ± 1.7             | 111.1 ± 6.2    | <0.0001 |
| Liver hydroxyproline (µg/mg liver) | 0.140 ± 0.008          | 0.192 ± 0.015  | 0.0013  |

Data are mean ± s.e.m.; p-values are t-test between animals with and without NAFLD

**Supplementary Table S4.** List of the significantly enriched up-regulated pathways in NAFLD (FDR q-value <0.05)

| <b>Enriched up-regulated pathways</b>                                                                            | <b>NES</b> | <b>FDR q-value</b> |
|------------------------------------------------------------------------------------------------------------------|------------|--------------------|
| NRF2 TARGETS                                                                                                     | 2.617      | 0.00000            |
| PPARA TARGETS                                                                                                    | 2.404      | 0.00000            |
| WP1248 OXIDATIVE PHOSPHORYLATION                                                                                 | 2.328      | 0.00000            |
| WP295 ELECTRON TRANSPORT CHAIN                                                                                   | 2.299      | 0.00068            |
| KEGG OXIDATIVE PHOSPHORYLATION                                                                                   | 2.260      | 0.00081            |
| KEGG LYSOSOME                                                                                                    | 2.223      | 0.00090            |
| WP1269 FATTY ACID BETA OXIDATION                                                                                 | 2.208      | 0.00097            |
| KEGG FATTY ACID ELONGATION                                                                                       | 2.180      | 0.00135            |
| KEGG FATTY ACID DEGRADATION                                                                                      | 2.146      | 0.00210            |
| MITOCHONDRIAL TRANSLATION                                                                                        | 2.113      | 0.00337            |
| MITOCHONDRIAL TRANSLATION TERMINATION                                                                            | 2.102      | 0.00344            |
| MAPK TARGETS NUCLEAR EVENTS MEDIATED BY MAP KINASES                                                              | 2.079      | 0.00418            |
| KEGG GLUTATHIONE METABOLISM                                                                                      | 2.052      | 0.00625            |
| RESPIRATORY ELECTRON TRANSPORT ATP SYNTHESIS BY CHEMIOSMOTIC COUPLING AND HEAT PRODUCTION BY UNCOUPLING PROTEINS | 2.048      | 0.00629            |
| SPHINGOLIPID METABOLISM                                                                                          | 2.032      | 0.00775            |
| AQUAPORIN MEDIATED TRANSPORT                                                                                     | 2.025      | 0.00786            |
| KEGG SYNAPTIC VESICLE CYCLE                                                                                      | 2.020      | 0.00795            |
| MITOCHONDRIAL TRANSLATION INITIATION                                                                             | 2.003      | 0.00937            |
| MEMBRANE TRAFFICKING                                                                                             | 1.991      | 0.01022            |
| MITOCHONDRIAL TRANSLATION ELONGATION                                                                             | 1.984      | 0.01085            |
| BIOC MPRPATHWAY                                                                                                  | 1.975      | 0.01157            |
| REGULATION OF ACTIN DYNAMICS FOR PHAGOCYTTIC CUP FORMATION                                                       | 1.962      | 0.01232            |
| IRON UPTAKE AND TRANSPORT                                                                                        | 1.963      | 0.01280            |
| MHC CLASS II ANTIGEN PRESENTATION                                                                                | 1.964      | 0.01319            |
| TRANSFERRIN ENDOCYTOSIS AND RECYCLING                                                                            | 1.943      | 0.01459            |
| RESPIRATORY ELECTRON TRANSPORT                                                                                   | 1.945      | 0.01479            |
| APOPTOTIC EXECUTION PHASE                                                                                        | 1.928      | 0.01634            |
| KEGG PPAR SIGNALING PATHWAY                                                                                      | 1.884      | 0.01960            |
| PHAGOSOMAL MATURATION EARLY ENDOSOMAL STAGE                                                                      | 1.910      | 0.01961            |
| WP2316 PPAR SIGNALING PATHWAY                                                                                    | 1.887      | 0.01962            |
| KEGG SPHINGOLIPID METABOLISM                                                                                     | 1.887      | 0.02005            |
| PROSTACYCLIN SIGNALLING THROUGH PROSTACYCLIN RECEPTOR                                                            | 1.889      | 0.02012            |
| CAM PATHWAY                                                                                                      | 1.890      | 0.02023            |
| KEGG VASOPRESSIN REGULATED WATER REABSORPTION                                                                    | 1.895      | 0.02026            |
| VASOPRESSIN REGULATES RENAL WATER HOMEOSTASIS VIA AQUAPORINS                                                     | 1.877      | 0.02040            |
| LYSOSOME VESICLE BIOGENESIS                                                                                      | 1.896      | 0.02043            |
| CALMODULIN INDUCED EVENTS                                                                                        | 1.892      | 0.02051            |
| BIOC CHREBPPATHWAY                                                                                               | 1.898      | 0.02056            |
| CA DEPENDENT EVENTS                                                                                              | 1.900      | 0.02085            |

|                                                                  |       |         |
|------------------------------------------------------------------|-------|---------|
| THE CITRIC ACID TCA CYCLE AND RESPIRATORY ELECTRON TRANSPORT     | 1.900 | 0.02152 |
| WP401 MITOCHONDRIAL LC FATTY ACID BETA OXIDATION                 | 1.870 | 0.02157 |
| MITOTIC PROPHASE                                                 | 1.859 | 0.02232 |
| SYNTHESIS AND INTERCONVERSION OF NUCLEOTIDE DI AND TRIPHOSPHATES | 1.860 | 0.02243 |
| TRANSLOCATION OF GLUT4 TO THE PLASMA MEMBRANE                    | 1.864 | 0.02248 |
| DARPP 32 EVENTS                                                  | 1.855 | 0.02260 |
| NUCLEAR EVENTS KINASE AND TRANSCRIPTION FACTOR ACTIVATION        | 1.850 | 0.02261 |
| LATENT INFECTION OF HOMO SAPIENS WITH MYCOBACTERIUM TUBERCULOSIS | 1.851 | 0.02286 |
| KEGG BIOSYNTHESIS OF UNSATURATED FATTY ACIDS                     | 1.860 | 0.02289 |
| INSULIN RECEPTOR RECYCLING                                       | 1.842 | 0.02434 |
| KEGG AMINO SUGAR AND NUCLEOTIDE SUGAR METABOLISM                 | 1.842 | 0.02471 |
| GLUCAGON TYPE LIGAND RECEPTORS                                   | 1.833 | 0.02616 |
| KEGG COLLECTING DUCT ACID SECRETION                              | 1.828 | 0.02650 |
| GLYCEROPHOSPHOLIPID BIOSYNTHESIS                                 | 1.822 | 0.02679 |
| KEGG OOCYTE MEIOSIS                                              | 1.829 | 0.02688 |
| APOPTOTIC CLEAVAGE OF CELLULAR PROTEINS                          | 1.823 | 0.02724 |
| CITRIC ACID CYCLE TCA CYCLE                                      | 1.813 | 0.02917 |
| GLYCOSPHINGOLIPID METABOLISM                                     | 1.794 | 0.03413 |
| INTRINSIC PATHWAY FOR APOPTOSIS                                  | 1.790 | 0.03454 |
| KEGG ALCOHOLISM                                                  | 1.779 | 0.03656 |
| BIOC BIOPEPTIDESPATHWAY                                          | 1.780 | 0.03688 |
| TRANS GOLGI NETWORK VESICLE BUDDING                              | 1.781 | 0.03706 |
| WP2087 MIRNA REGULATION OF DNA DAMAGE RESPONSE                   | 1.782 | 0.03737 |
| FATTY ACID TRIACYLGLYCEROL AND KETONE BODY METABOLISM            | 1.774 | 0.03805 |
| G ALPHA Z SIGNALLING EVENTS                                      | 1.768 | 0.03839 |
| WP317 GLYCOGEN METABOLISM                                        | 1.769 | 0.03877 |
| KEGG PARKINSON S DISEASE                                         | 1.769 | 0.03938 |
| METABOLISM OF NUCLEOTIDES                                        | 1.763 | 0.03947 |
| ADP SIGNALLING THROUGH P2Y PURINOCEPTOR 12                       | 1.759 | 0.04059 |
| CLATHRIN DERIVED VESICLE BUDDING                                 | 1.752 | 0.04113 |
| BIOC CREBPATHWAY                                                 | 1.755 | 0.04113 |
| KEGG DOPAMINERGIC SYNAPSE                                        | 1.750 | 0.04146 |
| ACTIVATION OF BAD AND TRANSLOCATION TO MITOCHONDRIA              | 1.752 | 0.04172 |
| KEGG TIGHT JUNCTION                                              | 1.746 | 0.04235 |
| KEGG RETINOL METABOLISM                                          | 1.736 | 0.04585 |
| SEMA3A PAK DEPENDENT AXON REPULSION                              | 1.726 | 0.04880 |
| POST CHAPERONIN TUBULIN FOLDING PATHWAY                          | 1.727 | 0.04916 |

**Supplementary Table S5.** List of the significantly enriched down-regulated pathways in NAFLD (FDR q-value <0.05)

| Enriched down-regulated pathways                                     | NES    | FDR q-value |
|----------------------------------------------------------------------|--------|-------------|
| WP449 COMPLEMENT AND COAGULATION CASCADES                            | -2.496 | 0.00000     |
| KEGG COMPLEMENT AND COAGULATION CASCADES                             | -2.496 | 0.00000     |
| KEGG SELENOCOMPOUND METABOLISM                                       | -2.229 | 0.00018     |
| FORMATION OF FIBRIN CLOT CLOTTING CASCADE                            | -2.272 | 0.00024     |
| WP200 COMPLEMENT ACTIVATION CLASSICAL PATHWAY                        | -2.219 | 0.00028     |
| BIOC INTRINSICPATHWAY                                                | -2.081 | 0.00213     |
| COMMON PATHWAY                                                       | -2.086 | 0.00226     |
| REGULATION OF COMPLEMENT CASCADE                                     | -2.066 | 0.00304     |
| COMPLEMENT CASCADE                                                   | -2.023 | 0.00428     |
| AMINO ACID TRANSPORT ACROSS THE PLASMA MEMBRANE                      | -1.995 | 0.00606     |
| WP460 BLOOD CLOTTING CASCADE                                         | -1.962 | 0.00857     |
| INTRINSIC PATHWAY                                                    | -1.963 | 0.00928     |
| GLUTAMATE NEUROTRANSMITTER RELEASE CYCLE                             | -1.930 | 0.01245     |
| BMAL1 CLOCK NPAS2 ACTIVATES CIRCADIAN GENE EXPRESSION                | -1.832 | 0.04132     |
| SYNTHESIS OF BILE ACIDS AND BILE SALTS VIA 7ALPHA HYDROXYCHOLESTEROL | -1.821 | 0.04408     |
| WP310 MRNA PROCESSING                                                | -1.806 | 0.04612     |
| KEGG PROTEIN EXPORT                                                  | -1.806 | 0.04900     |

**Supplementary Table S6.** The list of genes in core enrichment of NRF2 targets

|    | <b>NRF2</b> | <b>Rank in gene</b> |
|----|-------------|---------------------|
| 1  | NQO1        | 24                  |
| 2  | UGDH        | 36                  |
| 3  | SRXN1       | 44                  |
| 4  | GPX1        | 60                  |
| 5  | ABCB1A      | 99                  |
| 6  | ALDH1A7     | 112                 |
| 7  | SULT1C2     | 128                 |
| 8  | GCLC        | 141                 |
| 9  | FTH1        | 151                 |
| 10 | EPHX1       | 164                 |
| 11 | GSTM3       | 287                 |
| 12 | GSTM4       | 332                 |
| 13 | ALDH3A2     | 344                 |
| 14 | PGD         | 347                 |
| 15 | SQSTM1      | 387                 |
| 16 | ALDH1A1     | 508                 |
| 17 | CES1G       | 689                 |
| 18 | GSTM1       | 730                 |
| 19 | GSTM5       | 767                 |
| 20 | CBR3        | 818                 |
| 21 | ABCC4       | 864                 |
| 22 | TKT         | 899                 |
| 23 | ALDH9A1     | 910                 |
| 24 | BLVRB       | 1076                |
| 25 | GSTM2       | 1115                |
| 26 | GPX3        | 1527                |
| 27 | GSS         | 1726                |

**Supplementary Table S7.** The list of genes in core enrichment of PPAR $\alpha$  targets

|    | <b>PPAR<math>\alpha</math></b> | <b>Rank in gene</b> |    | <b>PPAR<math>\alpha</math></b> | <b>Rank in gene</b> |
|----|--------------------------------|---------------------|----|--------------------------------|---------------------|
| 1  | CIDEA                          | 0                   | 42 | HMGCL                          | 1074                |
| 2  | UGT1A9                         | 1                   | 43 | ACADM                          | 1096                |
| 3  | CIDEC                          | 2                   | 44 | ACOT9                          | 1144                |
| 4  | MOGAT1                         | 9                   | 45 | ELOVL5                         | 1147                |
| 5  | PLIN4                          | 27                  | 46 | PCTP                           | 1178                |
| 6  | CD36                           | 35                  | 47 | CYP3A11                        | 1220                |
| 7  | ECH1                           | 38                  | 48 | EHHADH                         | 1251                |
| 8  | CPT1B                          | 55                  | 49 | HSD17B10                       | 1307                |
| 9  | AQP7                           | 56                  | 50 | ACAT1                          | 1309                |
| 10 | SLC27A4                        | 73                  | 51 | ACAA1B                         | 1397                |
| 11 | ACOT2                          | 75                  | 52 | SLC25A20                       | 1458                |
| 12 | CYP4A14                        | 86                  | 53 | ECI1                           | 1490                |
| 13 | PEX11A                         | 110                 | 54 | ACOT5                          | 1501                |
| 14 | PLIN2                          | 139                 | 55 | ACOT8                          | 1507                |
| 15 | VLDLR                          | 173                 | 56 | ACACB                          | 1521                |
| 16 | CRAT                           | 244                 | 57 | CPT2                           | 1543                |
| 17 | CYP4A10                        | 306                 | 58 | GPAM                           | 1592                |
| 18 | ALDH3A2                        | 344                 | 59 | AGPAT3                         | 1671                |
| 19 | AGXT2                          | 360                 | 60 | HADH                           | 1683                |
| 20 | ELOVL7                         | 410                 | 61 | ABCD2                          | 1809                |
| 21 | LIPA                           | 428                 | 62 | CYP4A12A                       | 1826                |
| 22 | HADHA                          | 449                 | 63 | ACOT1                          | 1989                |
| 23 | ACAD9                          | 509                 | 64 | UCP3                           | 2131                |
| 24 | IL1RN                          | 525                 | 65 | ACSM3                          | 2132                |
| 25 | FABP2                          | 541                 | 66 | SCD2                           | 2139                |
| 26 | ODC1                           | 549                 | 67 | PLTP                           | 2292                |
| 27 | SLC25A10                       | 634                 | 68 | OAT                            | 2367                |
| 28 | CROT                           | 687                 | 69 | CPT1A                          | 2517                |
| 29 | CES1G                          | 689                 | 70 | ACOT7                          | 2553                |
| 30 | FGF21                          | 699                 | 71 | ACOX1                          | 2576                |
| 31 | PDK4                           | 713                 | 72 | CYP2J6                         | 2601                |
| 32 | LIPE                           | 716                 | 73 | GPD2                           | 2629                |
| 33 | ACOT3                          | 738                 | 74 | ACADL                          | 2813                |
| 34 | GYK                            | 776                 | 75 | HSD17B4                        | 2842                |
| 35 | ALDH9A1                        | 910                 | 76 | MGLL                           | 2994                |
| 36 | ACOT4                          | 916                 | 77 | ETFDH                          | 2997                |
| 37 | ACAD10                         | 928                 | 78 | ACOT10                         | 3011                |
| 38 | RAB9                           | 1033                | 79 | ABCB4                          | 3036                |
| 39 | DECR2                          | 1050                | 80 | UCP2                           | 3040                |
| 40 | DECR1                          | 1055                | 81 | ACAA1A                         | 3110                |
| 41 | TXNIP                          | 1065                |    |                                |                     |

**Supplementary Table S8.** The list of genes in core enrichment of MAPK targets

| <b>MAPK</b> | <b>Rank in gene list</b> |
|-------------|--------------------------|
| PPP2R1B     | 12                       |
| DUSP3       | 115                      |
| MAPK3       | 621                      |
| JUN         | 1001                     |
| MAPK9       | 1066                     |
| MAPKAPK2    | 1214                     |
| RPS6KA1     | 1407                     |
| MAPK8       | 1570                     |
| MAPK10      | 2011                     |
| PPP2R1A     | 2102                     |
| PPP2CA      | 2797                     |



## SUPPLEMENTARY FIGURES

### Supplementary Figure S1

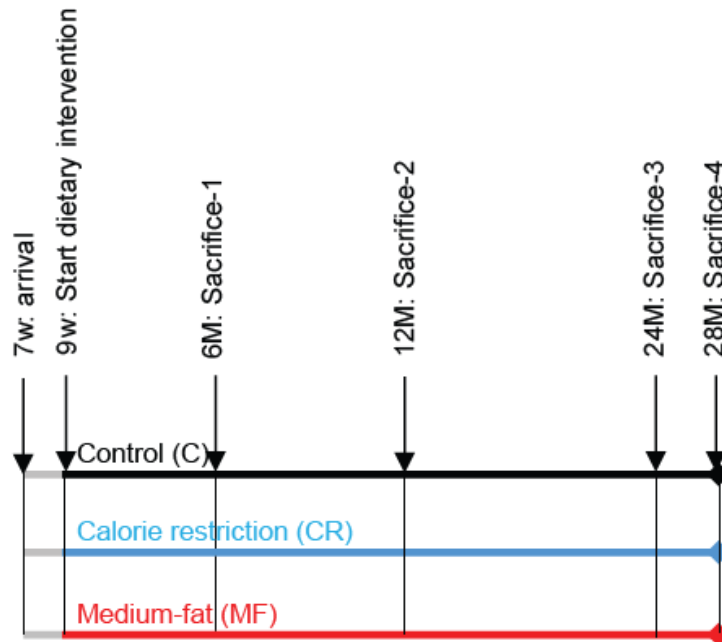

**Supplementary Figure S1.** Study design scheme. The male C57BL/6J mice arrived at 7 weeks old and were acclimatized for 2 weeks. The dietary intervention was started at the age of 9 weeks and the mice were culled at 6, 12, 24 and 28 months, in order to cover different life stages.

## Supplementary Figure S2

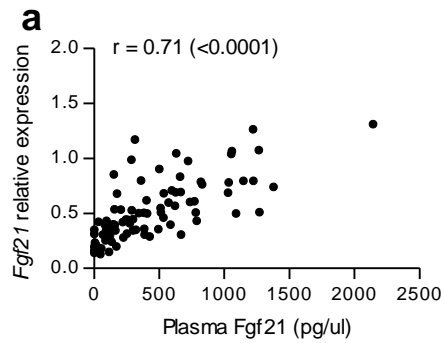

**Supplementary Figure S2a.** Validating the microarray data, plasma Fgf21 levels were positively correlated with hepatic Fgf21 expressions, which was obtained through Q-PCR technique.  $r$  value and its significance were calculated with Pearson's correlation.

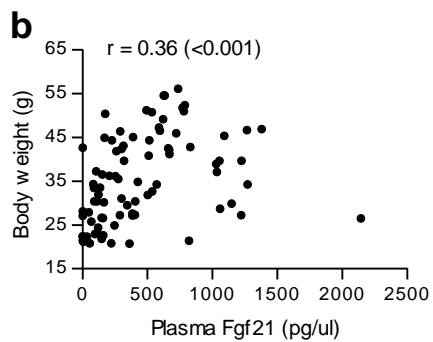

**Supplementary Figure S2b.** Plasma Fgf21 levels were positively correlated with body weight.  $r$  value and its significance were calculated with Pearson's correlation.

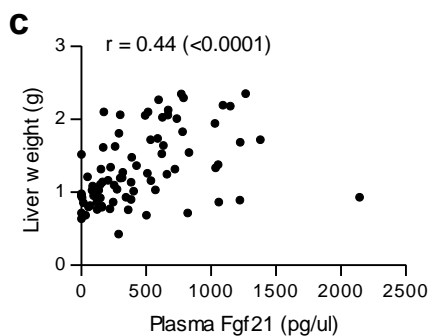

**Supplementary Figure S2c.** Plasma Fgf21 levels were positively correlated with liver weight.  $r$  value and its significance were calculated with Pearson's correlation.

**Supplementary Figure S3**

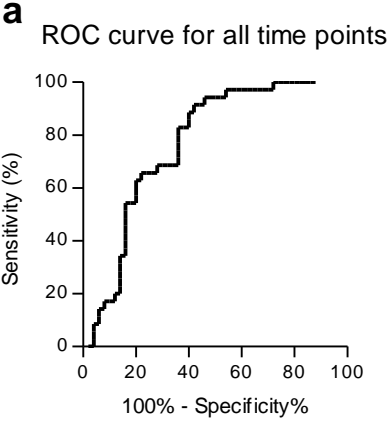

**Supplementary Figure S3a.** ROC analysis of plasma Fgf21 predicting animals with and without NAFLD. In this analysis, all animals from 4 age time points were included.

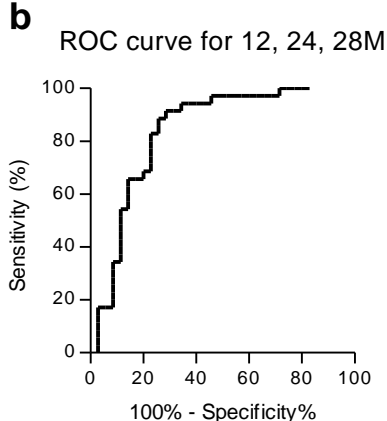

**Supplementary Figure S3b.** ROC analysis of plasma Fgf21 predicting animals with and without NAFLD at middle and old age. The 6 month-old mice were excluded in this analysis.

## Supplementary Figure S4

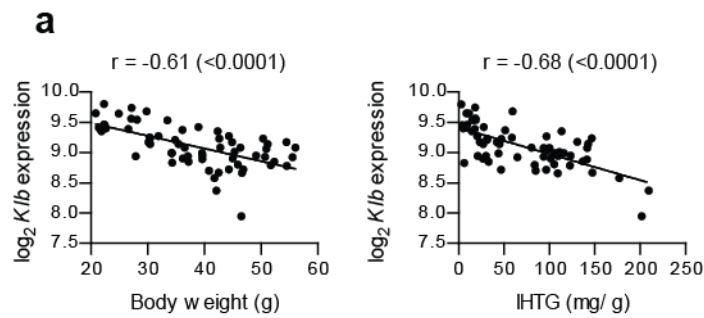

**Supplementary Figure S4a.** Body weight and intrahepatic triglyceride (IHTG) were inversely correlated with *Klb* expression levels.  $r$  values and their significance (in parentheses) were calculated with Pearson's correlation.

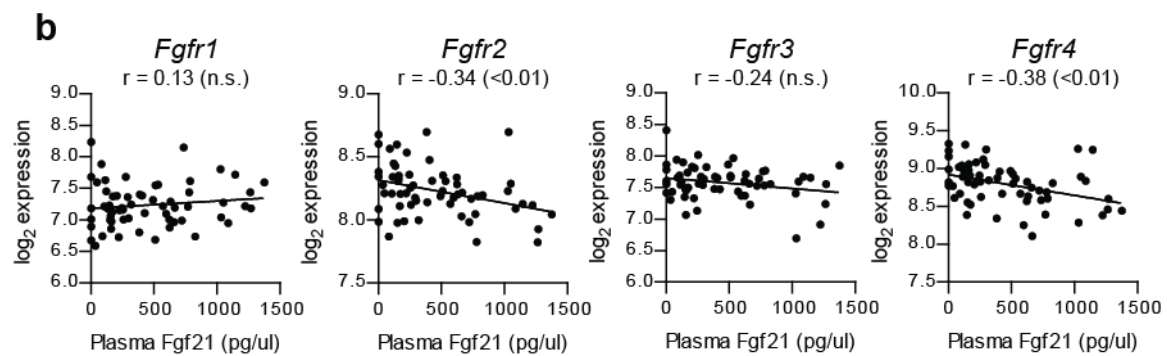

**Supplementary Figure S4b.** Correlations between the plasma Fgf21 and gene expression levels of *Fgfr1*, *Fgfr2*, *Fgfr3*, and *Fgfr4*.  $r$  values and their significance (in parentheses) were calculated with Pearson's correlation.

## Supplementary Figure S5

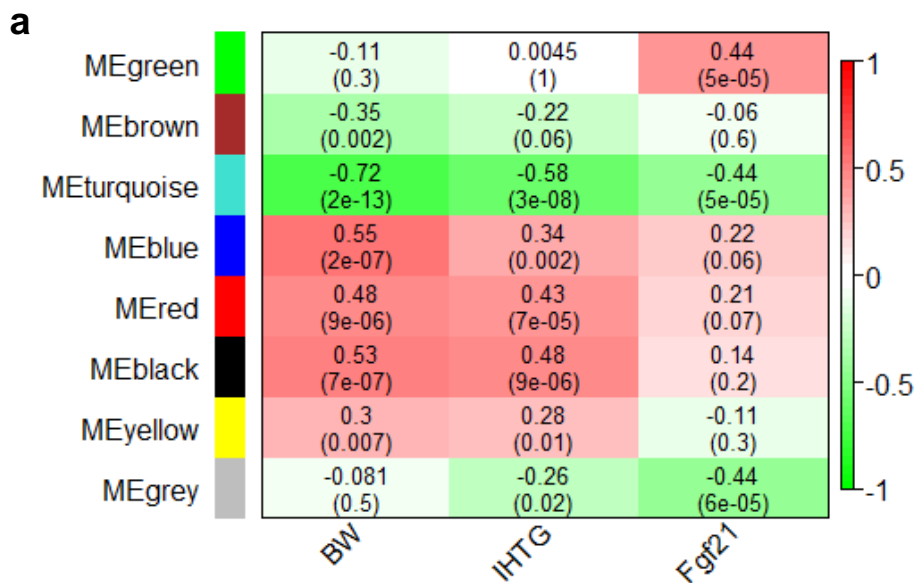

**Supplementary Figure S5a.** Heat map depicting the correlation between gene modules (in rows) and phenotypes (in columns). To investigate the functions of the genes associated with the elevated Fgf21 plasma level at young age without accumulation of IHTG, this analysis was performed with the inclusion of the 6 month old animals. In this analysis, the variable deepSplit setting in WGCNA was fine-tuned to obtain a module with a strong correlation with plasma Fgf21 levels, but not with IHTG content. The top values in each cell represents the correlation coefficient between the module and phenotype with the correlation p-value in parentheses. Red and green color represents positive and negative correlation, respectively.

## b

| IPA results              | Biological processes/regulators           | p-value/ z-score                            |
|--------------------------|-------------------------------------------|---------------------------------------------|
| Liver-specific functions | Liver steatosis                           | $2.39 \times 10^{-1} - 4.18 \times 10^{-3}$ |
|                          | Hepatocellular peroxisome proliferation   | $4.28 \times 10^{-2} - 1.36 \times 10^{-8}$ |
|                          | Liver damage                              | $5.51 \times 10^{-1} - 1.15 \times 10^{-3}$ |
| Canonical pathways       | Mitochondrial L-carnitine shuttle pathway | $8.09 \times 10^{-7}$                       |
|                          | Fatty acid $\beta$ -oxidation I           | $1.11 \times 10^{-6}$                       |
|                          | Stearate biosynthesis I (animals)         | $2.29 \times 10^{-6}$                       |
| Upstream regulators      | PPAR $\alpha$                             | 5.905                                       |
|                          | PPARGC1 $\alpha$                          | 3.349                                       |
|                          | PPARG $\gamma$                            | 3.313                                       |

**Supplementary Figure S5b.** Biological processes, pathways and regulators associated with MEgreen (in Supplementary Figure S5a). Significant liver-specific functions and canonical pathways are reported in p-values. Significant upstream regulators are reported in predicted activation z-score. Positive and negative z-score represent predicted activation and inhibition, respectively.
